# Supplementary material for: SARS-CoV-2 N gene dropout and N gene Ct value shift as indicator for the presence of B.1.1.7 lineage in a widely used commercial multiplex PCR assay
Source: bioRxiv or medRxiv preprint supplement (doi:10.1101/2021.03.23.21254171), 2021-03-26
Supplement: Supplementary file [file media-1.pdf]

**Supplemental data 1A, B, C, D. A).** Linear regression of Ct values of S gene and RdRp gene of B.1.1.7 (left panel, blue line and 99% prediction band) and non-B.1.1.7 (right panel, gray line and 99% prediction band) positive patient specimens. **B and C).** Included samples (n=106) with Ct values of the S, RdRP and N gene by the Allplex™ SARS-CoV-2/FluA/FluB/RSV assay with the corresponding results of whole genome sequencing or variant specific PCR. N501Y+, Del. H69/V70+ indicate presence of lineage B.1.1.7 **D.)** Nucleotide sequence alignment (MUSCLE) of N gene sequences from two exemplary patient samples (non-B.1.1.7 and B.1.1.7, respectively) and pCRII-TOPO\_N-gene\_D3 and \_3L plasmids. Only the region containing the D3L mutation is shown (nucleotide position 1-12), with D3 highlighted in green (non-B.1.1.7) and 3L (B.1.1.7) highlighted in red. Translated amino acid sequences are shown above and below the nucleotide sequences. N gene sequences from the patient samples were extracted from whole-genome sequences.

**A)**

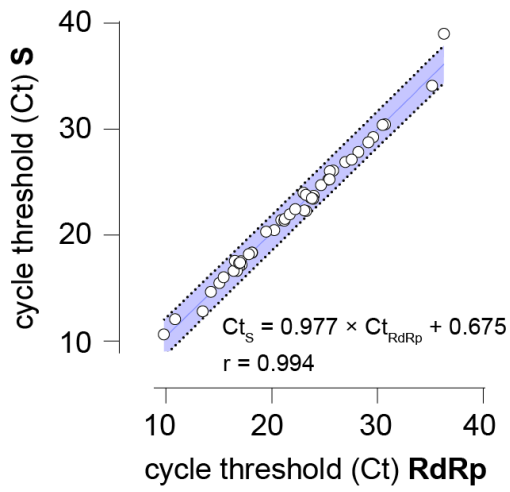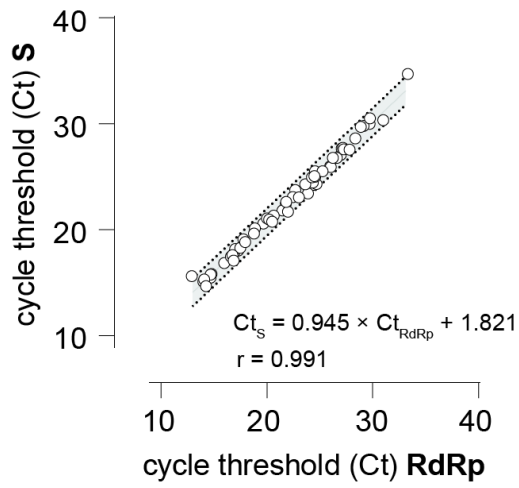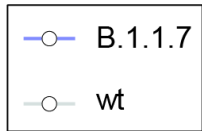

| B) | Allplex™ SARS-CoV-2/FluA/FluB/RSV |       |       | Δ N/RdRP     | Δ N/S        | Lineage / variant PCR |                       |
|----|-----------------------------------|-------|-------|--------------|--------------|-----------------------|-----------------------|
|    | Sample                            | S     | RdRP  |              |              |                       | N                     |
|    |                                   |       |       |              |              |                       |                       |
|    | patient 1                         | 26.10 | 25.80 | 32.80        | <b>7.00</b>  | <b>6.70</b>           | B.1.1.7               |
|    | patient 2                         | 17.54 | 17.09 | 24.31        | <b>7.22</b>  | <b>6.77</b>           | B.1.1.7               |
|    | patient 3                         | 26.04 | 25.48 | 33.16        | <b>7.68</b>  | <b>7.12</b>           | B.1.1.7               |
|    | patient 4                         | 22.27 | 23.26 | 31.47        | <b>8.21</b>  | <b>9.20</b>           | B.1.1.7               |
|    | patient 5                         | 18.33 | 18.13 | 25.44        | <b>7.31</b>  | <b>7.11</b>           | B.1.1.7               |
|    | patient 6                         | 26.90 | 26.96 | 37.23        | <b>10.27</b> | <b>10.33</b>          | B.1.1.7               |
|    | patient 7                         | 21.42 | 20.91 | 27.75        | <b>6.84</b>  | <b>6.33</b>           | B.1.1.7               |
|    | patient 8                         | 18.35 | 18.10 | 24.55        | <b>6.45</b>  | <b>6.20</b>           | B.1.1.7               |
|    | patient 9                         | 22.32 | 23.07 | 30.69        | <b>7.62</b>  | <b>8.37</b>           | B.1.1.7               |
|    | patient 10                        | 12.79 | 13.47 | 21.56        | <b>8.09</b>  | <b>8.77</b>           | B.1.1.7               |
|    | patient 11                        | 15.48 | 15.05 | 24.39        | <b>9.34</b>  | <b>8.91</b>           | B.1.1.7               |
|    | patient 12                        | 17.19 | 17.15 | 24.85        | <b>7.70</b>  | <b>7.66</b>           | B.1.1.7               |
|    | patient 13                        | 29.25 | 29.59 | -            | -            | -                     | N501Y+, Del. H69/V70+ |
|    | patient 14                        | 27.83 | 28.19 | 37.48        | <b>9.29</b>  | <b>9.65</b>           | B.1.1.7               |
|    | patient 15                        | 17.03 | 16.90 | 25.92        | <b>9.02</b>  | <b>8.89</b>           | B.1.1.7               |
|    | patient 16                        | 25.23 | 25.36 | 33.51        | <b>8.15</b>  | <b>8.28</b>           | B.1.1.7               |
|    | patient 17                        | 21.35 | 21.19 | 28.51        | <b>7.32</b>  | <b>7.16</b>           | N501Y+, Del. H69/V70+ |
|    | patient 18                        | 27.14 | 27.55 | 35.38        | <b>7.83</b>  | <b>8.24</b>           | N501Y+, Del. H69/V70+ |
|    | patient 19                        | 23.53 | 23.66 | 30.65        | <b>6.99</b>  | <b>7.12</b>           | B.1.1.7               |
|    | patient 20                        | 14.63 | 14.23 | 22.40        | <b>8.17</b>  | <b>7.77</b>           | B.1.1.7               |
|    | patient 21                        | 20.46 | 20.25 | 28.61        | <b>8.36</b>  | <b>8.15</b>           | B.1.1.7               |
|    | patient 22                        | 10.63 | 9.80  | 19.90        | <b>10.10</b> | <b>9.27</b>           | B.1.1.7               |
|    | patient 23                        | 24.71 | 24.65 | 31.86        | <b>7.21</b>  | <b>7.15</b>           | B.1.1.7               |
|    | patient 24                        | 28.75 | 29.14 | -            | -            | -                     | B.1.1.7               |
|    | patient 25                        | 23.70 | 23.97 | 31.78        | <b>7.81</b>  | <b>8.08</b>           | B.1.1.7               |
|    | patient 26                        | 16.61 | 16.71 | 24.28        | <b>7.57</b>  | <b>7.67</b>           | N501Y+, Del. H69/V70+ |
|    | patient 27                        | 18.20 | 17.83 | 25.86        | <b>8.03</b>  | <b>7.66</b>           | N501Y+, Del. H69/V70+ |
|    | patient 28                        | 21.54 | 21.23 | 29.46        | <b>8.23</b>  | <b>7.92</b>           | N501Y+, Del. H69/V70+ |
|    | patient 29                        | 16.63 | 16.39 | 25.55        | <b>9.16</b>  | <b>8.92</b>           | N501Y+, Del. H69/V70+ |
|    | patient 30                        | 24.00 | 23.00 | 28.88        | <b>5.88</b>  | <b>4.88</b>           | N501Y+, Del. H69/V70+ |
|    | patient 31                        | 20.50 | 20.32 | 27.67        | <b>7.35</b>  | <b>7.17</b>           | N501Y+, Del. H69/V70+ |
|    | patient 32                        | 12.07 | 10.85 | 19.89        | <b>9.04</b>  | <b>7.82</b>           | N501Y+, Del. H69/V70+ |
|    | patient 33                        | 20.33 | 19.46 | 28.30        | <b>8.84</b>  | <b>7.97</b>           | N501Y+, Del. H69/V70+ |
|    | patient 34                        | 17.57 | 16.50 | 25.29        | <b>8.79</b>  | <b>7.72</b>           | N501Y+, Del. H69/V70+ |
|    | patient 35                        | 23.81 | 23.23 | 31.61        | <b>8.38</b>  | <b>7.80</b>           | N501Y+, Del. H69/V70+ |
|    | patient 36                        | 18.43 | 18.04 | 26.31        | <b>8.27</b>  | <b>7.88</b>           | B.1.1.7               |
|    | patient 37                        | 30.45 | 30.70 | -            | -            | -                     | N501Y+, Del. H69/V70+ |
|    | patient 38                        | 30.40 | 30.48 | -            | -            | -                     | N501Y+, Del. H69/V70+ |
|    | patient 39                        | 34.10 | 35.15 | -            | -            | -                     | N501Y+, Del. H69/V70+ |
|    | patient 40                        | 16.02 | 15.45 | <b>23.73</b> | <b>8.28</b>  | <b>7.71</b>           | B.1.1.7               |
|    | patient 41                        | 21.97 | 21.69 | <b>28.61</b> | <b>6.92</b>  | <b>6.64</b>           | B.1.1.7               |
|    | patient 42                        | 17.35 | 16.91 | <b>23.66</b> | <b>6.75</b>  | <b>6.31</b>           | B.1.1.7               |
|    | patient 43                        | 23.42 | 23.92 | <b>30.73</b> | <b>6.81</b>  | <b>7.31</b>           | B.1.1.7               |
|    | patient 44                        | 23.49 | 23.79 | <b>31.06</b> | <b>7.27</b>  | <b>7.57</b>           | B.1.1.7               |
|    | patient 45                        | 39.01 | 36.29 | -            | -            | -                     | B.1.1.7               |
|    | patient 46                        | 17.41 | 16.98 | <b>25.59</b> | <b>8.61</b>  | <b>8.18</b>           | B.1.1.7               |
|    | patient 47                        | 22.46 | 22.23 | <b>28.52</b> | <b>6.29</b>  | <b>6.06</b>           | B.1.1.7               |
|    | patient 48                        | 25.25 | 25.47 | <b>32.25</b> | <b>6.78</b>  | <b>7.00</b>           | B.1.1.7               |

| C)          | Sample | Allplex™ SARS-CoV-2/FluA/FluB/RSV |       |       | Δ N/RdRP | Δ N/S                 | Lineage / variant PCR |
|-------------|--------|-----------------------------------|-------|-------|----------|-----------------------|-----------------------|
|             |        | S                                 | RdRP  | N     |          |                       |                       |
|             |        | patient 49                        | 15.81 | 14.76 |          |                       |                       |
| patient 50  | 16.85  | 15.97                             | 14.79 | 1.18  | 2.06     | B.1.1.317             |                       |
| patient 51  | 30.01  | 29.72                             | 27.62 | 2.10  | 2.39     | N501Y+, E484K+        |                       |
| patient 52  | 18.04  | 17.28                             | 16.94 | 0.34  | 1.10     | N501Y-, Del. H69/V70- |                       |
| patient 53  | 24.24  | 24.37                             | 23.87 | 0.50  | 0.37     | N501Y-, Del. H69/V70- |                       |
| patient 54  | 24.32  | 24.68                             | 23.87 | 0.81  | 0.45     | N501Y-, Del. H69/V70- |                       |
| patient 55  | 15.46  | 14.67                             | 14.47 | 0.20  | 0.99     | N501Y-, Del. H69/V70- |                       |
| patient 56  | 15.77  | 14.67                             | 14.33 | 0.34  | 1.44     | N501Y-, Del. H69/V70- |                       |
| patient 57  | 17.83  | 16.91                             | 15.00 | 1.91  | 2.83     | N501Y-, Del. H69/V70- |                       |
| patient 58  | 24.45  | 24.34                             | 22.52 | 1.82  | 1.93     | N501Y-, Del. H69/V70- |                       |
| patient 59  | 17.44  | 16.59                             | 15.95 | 0.64  | 1.49     | N501Y-, Del. H69/V70- |                       |
| patient 60  | 25.98  | 25.97                             | 25.22 | 0.75  | 0.76     | N501Y-, Del. H69/V70- |                       |
| patient 61  | 29.81  | 29.14                             | 27.36 | 1.78  | 2.45     | N501Y-, Del. H69/V70- |                       |
| patient 62  | 27.07  | 26.99                             | 25.94 | 1.05  | 1.13     | N501Y-, Del. H69/V70- |                       |
| patient 63  | 28.62  | 28.35                             | 26.22 | 2.13  | 2.40     | N501Y-, Del. H69/V70- |                       |
| patient 64  | 18.17  | 16.99                             | 16.11 | 0.88  | 2.06     | N501Y-, Del. H69/V70- |                       |
| patient 65  | 20.57  | 19.65                             | 18.50 | 1.15  | 2.07     | N501Y-, Del. H69/V70- |                       |
| patient 66  | 15.61  | 12.88                             | 12.27 | 0.61  | 3.34     | N501Y-, Del. H69/V70- |                       |
| patient 67  | 22.45  | 21.80                             | 21.14 | 0.66  | 1.31     | N501Y-, Del. H69/V70- |                       |
| patient 68  | 23.74  | 22.68                             | 21.35 | 1.33  | 2.39     | N501Y-, Del. H69/V70- |                       |
| patient 69  | 21.06  | 20.01                             | 18.79 | 1.22  | 2.27     | N501Y-, Del. H69/V70- |                       |
| patient 70  | 27.68  | 27.07                             | 26.11 | 0.96  | 1.57     | N501Y-, Del. H69/V70- |                       |
| patient 71  | 20.12  | 18.87                             | 17.69 | 1.18  | 2.43     | N501Y-, Del. H69/V70- |                       |
| patient 72  | 15.09  | 13.98                             | 13.52 | 0.46  | 1.57     | N501Y-, Del. H69/V70- |                       |
| patient 73  | 25.91  | 26.03                             | 23.74 | 2.29  | 2.17     | N501Y-, Del. H69/V70- |                       |
| patient 74  | 19.64  | 18.76                             | 18.10 | 0.66  | 1.54     | N501Y-, Del. H69/V70- |                       |
| patient 75  | 18.28  | 17.49                             | 16.77 | 0.72  | 1.51     | N501Y-, Del. H69/V70- |                       |
| patient 76  | 17.59  | 16.73                             | 16.09 | 0.64  | 1.50     | N501Y-, Del. H69/V70- |                       |
| patient 77  | 19.08  | 17.77                             | 16.12 | 1.65  | 2.96     | N501Y-, Del. H69/V70- |                       |
| patient 78  | 23.09  | 22.45                             | 21.24 | 1.21  | 1.85     | N501Y-, Del. H69/V70- |                       |
| patient 79  | 18.83  | 17.95                             | 16.56 | 1.39  | 2.27     | N501Y-, Del. H69/V70- |                       |
| patient 80  | 27.74  | 27.18                             | 26.60 | 0.58  | 1.14     | N501Y-, Del. H69/V70- |                       |
| patient 81  | 15.29  | 14.08                             | 13.34 | 0.74  | 1.95     | N501Y-, Del. H69/V70- |                       |
| patient 82  | 14.68  | 14.24                             | 12.99 | 1.25  | 1.69     | N501Y-, Del. H69/V70- |                       |
| patient 83  | 26.78  | 26.60                             | 25.85 | 0.75  | 0.93     | N501Y-, Del. H69/V70- |                       |
| patient 84  | 17.07  | 16.86                             | 16.25 | 0.61  | 0.82     | N501Y-, Del. H69/V70- |                       |
| patient 85  | 25.51  | 24.55                             | 23.89 | 0.66  | 1.62     | N501Y-, Del. H69/V70- |                       |
| patient 86  | 25.01  | 24.58                             | 23.20 | 1.38  | 1.81     | N501Y-, Del. H69/V70- |                       |
| patient 87  | 23.42  | 23.88                             | 22.09 | 1.79  | 1.33     | N501Y-, Del. H69/V70- |                       |
| patient 88  | 26.78  | 26.24                             | 25.44 | 0.80  | 1.34     | N501Y-, Del. H69/V70- |                       |
| patient 89  | 27.59  | 27.28                             | 26.16 | 1.12  | 1.43     | N501Y-, Del. H69/V70- |                       |
| patient 90  | 16.85  | 15.97                             | 14.76 | 1.21  | 2.09     | N501Y-, Del. H69/V70- |                       |
| patient 91  | 34.70  | 33.32                             | 31.63 | 1.69  | 3.07     | N501Y-, Del. H69/V70- |                       |
| patient 92  | 21.83  | 21.48                             | 19.50 | 1.98  | 2.33     | N501Y-, Del. H69/V70- |                       |
| patient 93  | 24.28  | 23.63                             | 22.82 | 0.81  | 1.46     | N501Y-, Del. H69/V70- |                       |
| patient 94  | 21.34  | 20.65                             | 19.76 | 0.89  | 1.58     | N501Y-, Del. H69/V70- |                       |
| patient 95  | 23.06  | 23.01                             | 21.90 | 1.11  | 1.16     | N501Y-, Del. H69/V70- |                       |
| patient 96  | 27.57  | 27.82                             | 26.53 | 1.29  | 1.04     | N501Y-, Del. H69/V70- |                       |
| patient 97  | 21.71  | 21.98                             | 20.94 | 1.04  | 0.77     | N501Y-, Del. H69/V70- |                       |
| patient 98  | 29.71  | 28.87                             | 27.83 | 1.04  | 1.88     | N501Y-, Del. H69/V70- |                       |
| patient 99  | 20.96  | 20.20                             | 19.30 | 0.90  | 1.66     | N501Y-, Del. H69/V70- |                       |
| patient 100 | 24.94  | 24.25                             | 23.36 | 0.89  | 1.58     | N501Y-, Del. H69/V70- |                       |
| patient 101 | 30.33  | 30.99                             | 28.11 | 2.88  | 2.22     | N501Y-, Del. H69/V70- |                       |
| patient 102 | 30.52  | 29.73                             | 28.49 | 1.24  | 2.03     | N501Y-, Del. H69/V70- |                       |
| patient 103 | 25.52  | 25.26                             | 24.44 | 0.82  | 1.08     | N501Y-, Del. H69/V70- |                       |
| patient 104 | 22.63  | 21.81                             | 19.75 | 2.06  | 2.88     | N501Y-, Del. H69/V70- |                       |
| patient 105 | 25.07  | 24.48                             | 23.45 | 1.03  | 1.62     | N501Y-, E484K+        |                       |
| patient 106 | 20.74  | 20.49                             | 20.39 | 0.1   | 0.35     | B.1.351               |                       |

**D)**

patient 49 (non-B.1.1.7)  
pCR11-TOPO\_N-gene\_D3  
patient 1 (B.1.1.7)  
pCR11-TOPO\_N-gene\_3L

|     |     |     |     |    |
|-----|-----|-----|-----|----|
| 1   |     |     |     | 12 |
| M   | S   | D   | T   |    |
| ATG | TCT | GAT | AAT |    |
| ATG | TCT | GAT | AAT |    |
| ATG | TCT | CTA | AAT |    |
| ATG | TCT | CTA | AAT |    |
| M   | S   | L   | T   |    |
